# Supplementary material
Source: PubMed Central journal article supplement (PMC6376279)

**Supplemental Table 1.** Antibodies used for flow cytometry analysis:

| <b>Antibody</b>                | <b>Fluorochrome</b> | <b>Clone</b> | <b>Provider</b> |
|--------------------------------|---------------------|--------------|-----------------|
| Streptavidin                   | PE                  |              | BioLegend       |
| Streptavidin                   | FITC                |              | eBioscience     |
| Sca-1                          | PerCP-Cyanine5.5    | D7           | eBioscience     |
| c-Kit                          | APC-eFluor 780      | 2B8          | eBioscience     |
| CD48                           | PE                  | HM48-1       | eBioscience     |
| CD48                           | FITC                | HM48-1       | eBioscience     |
| CD41                           | PE                  | eBioMWReg30  | eBioscience     |
| CD41                           | FITC                | eBioMWReg30  | eBioscience     |
| CD150                          | PE-Cyanine7         | TC15-12F12.2 | BioLegend       |
| CD150                          | APC                 | TC15-12F12.2 | BioLegend       |
| CD45.1                         | PE-Cyanine7         | A20          | eBioscience     |
| CD45.2                         | FITC                | 104          | eBioscience     |
| CD45.2                         | PE                  | 104          | eBioscience     |
| CD105                          | PE-Cyanine7         | MJ7/18       | BioLegend       |
| Mac-1                          | PE                  | M1/70        | eBioscience     |
| Gr-1                           | FITC                | RB6-8C5      | eBioscience     |
| CD3e                           | PerCP-eFluor710     | 17A2         | eBioscience     |
| CD19                           | APC-eFluor 780      | eBio1D3      | eBioscience     |
| CD19                           | PE-Cyanine7         | eBio1D3      | eBioscience     |
| Ki67                           | FITC                | SolA15       | eBioscience     |
| Lineage markers (#130-090-858) | Biotin              |              | Miltenyi        |

**Supplemental Table 2.** Antibodies used for CyTOF analysis:

Antibodies were either purchased from the indicated vendor or prepared in-house using commercially available MaxPAR conjugation kits per manufacturer's instructions (Fluidigm).

| <b>Antigen</b>           | <b>Panel</b> | <b>Symb</b> | <b>Mass</b> | <b>final conc.<br/>(<math>\mu\text{g/mL}</math>)</b> | <b>clone</b>     | <b>Provider</b> |
|--------------------------|--------------|-------------|-------------|------------------------------------------------------|------------------|-----------------|
| CD45.1                   | S            | In          | 113         | 3                                                    |                  |                 |
| CD45.2                   | S            | In          | 115         | 4                                                    | 104              | BioLegend       |
| Ly6G                     | S            | La          | 139         | 2                                                    | 1A8              | BioLegend       |
| cPARP                    | I            | Pr          | 141         | 1                                                    | F21-852          | BD              |
| CD41                     | S            | Nd          | 143         | 2                                                    | MWReg30          | Fluidigm        |
| CD16/32                  | S            | Nd          | 144         | 2                                                    | 93               | Fluidigm        |
| CD34                     | S            | Sm          | 147         | 2                                                    | RAM34            | BD              |
| Mac-1 (CD11b)            | S            | Nd          | 148         | 2                                                    | M1/70            | BioLegend       |
| pMAPKAPK-2<br>(pT334)    | I            | Eu          | 153         | 3                                                    | 27B7             | Cell Signaling  |
| CD48                     | S            | Sm          | 154         | 2                                                    | HM48-1           | Fluidigm        |
| B220                     | S            | Tb          | 159         | 2                                                    | RA3-6B2          | BD              |
| pSMAD2/3                 | I            | Dy          | 162         | 2                                                    | D27F4            | Cell Signaling  |
| Sca-1                    | S            | Dy          | 164         | 2                                                    | D7               | Fluidigm        |
| c-Kit                    | S            | Er          | 166         | 2                                                    | 2B8              | Fluidigm        |
| CD150                    | S            | Er          | 167         | 2                                                    | TC15-<br>12F12.2 | Fluidigm        |
| CD105                    | S            | Er          | 168         | 3                                                    | MJ7/18           | BioLegend       |
| TCRb                     | S            | Tm          | 169         | 2                                                    | H57-597          | Fluidigm        |
| Nk1.1                    | S            | Er          | 170         | 2                                                    | PK136            | Fluidigm        |
| CD135 (Flt-3)-<br>biotin | S            | -           | -           | 5                                                    | A2F10            | BioLegend       |
| biotin                   | I            | Yb          | 171         | 0.25                                                 | 1D4-C5           | BioLegend       |
| CD127 (IL7-RA)           | S            | Lu          | 175         | 2                                                    | A7R34            | Fluidigm        |

# Supplemental Figure 1

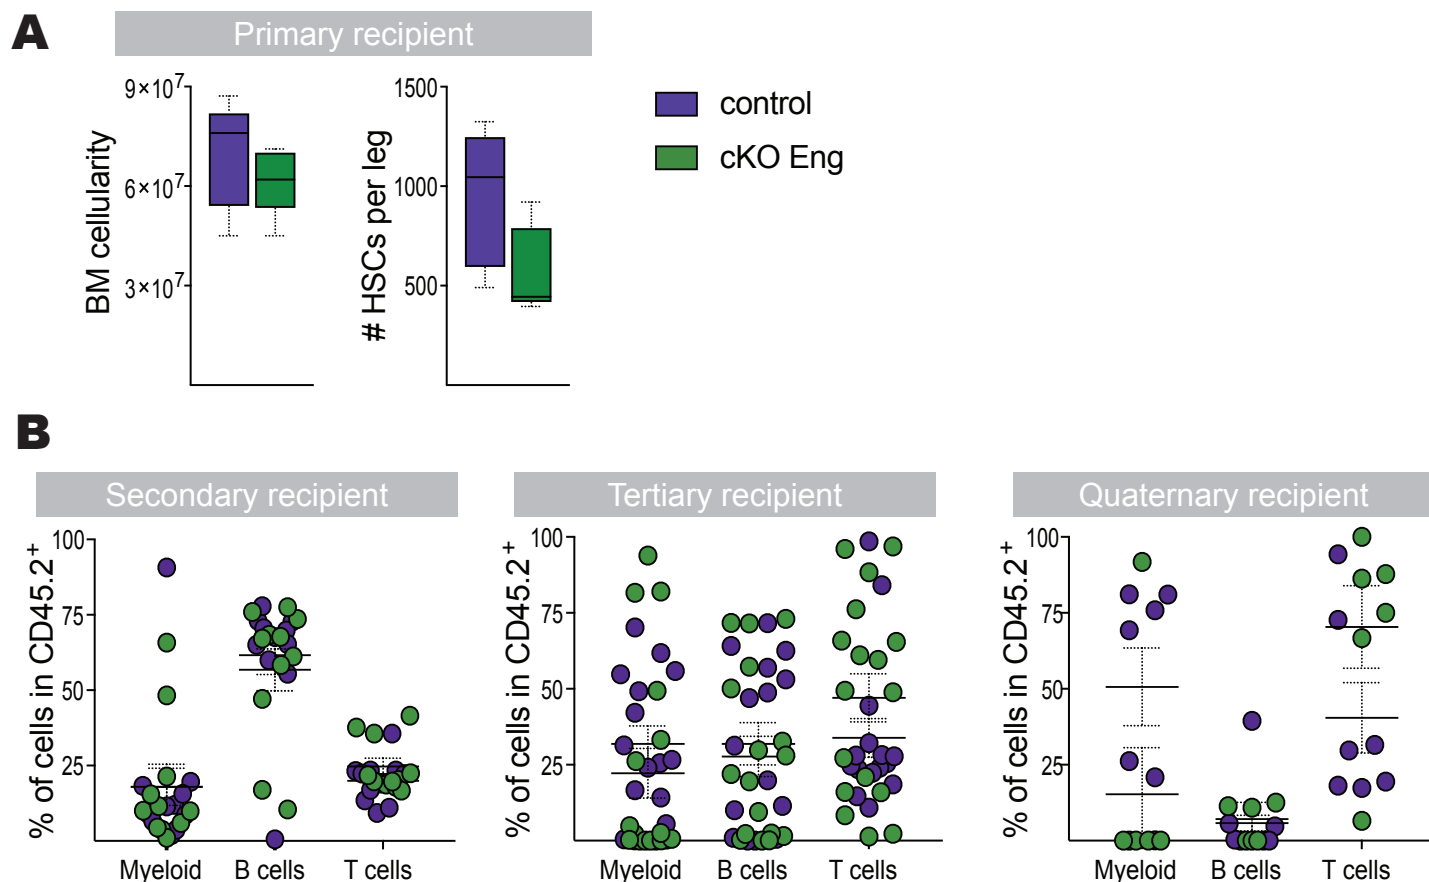

## Supplemental Figure 2

**A**

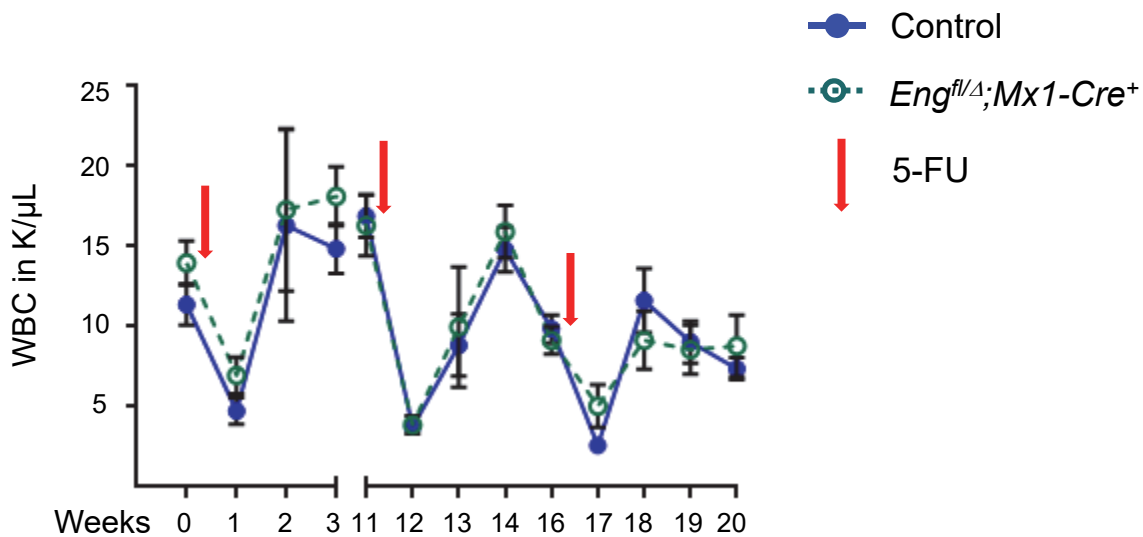

**B**

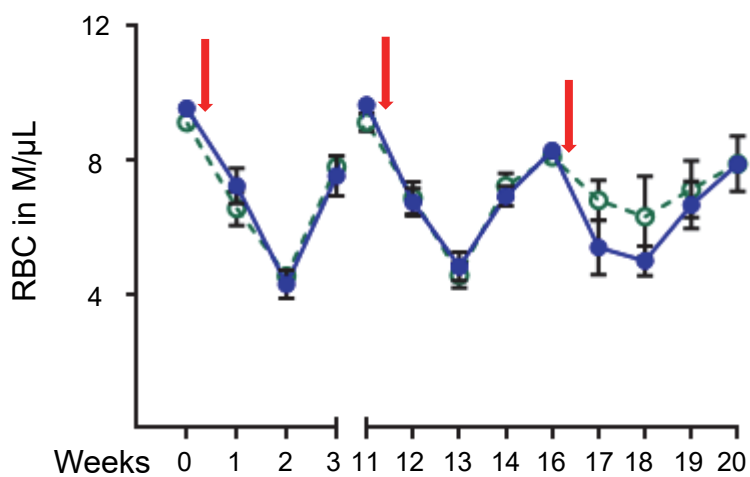

**C**

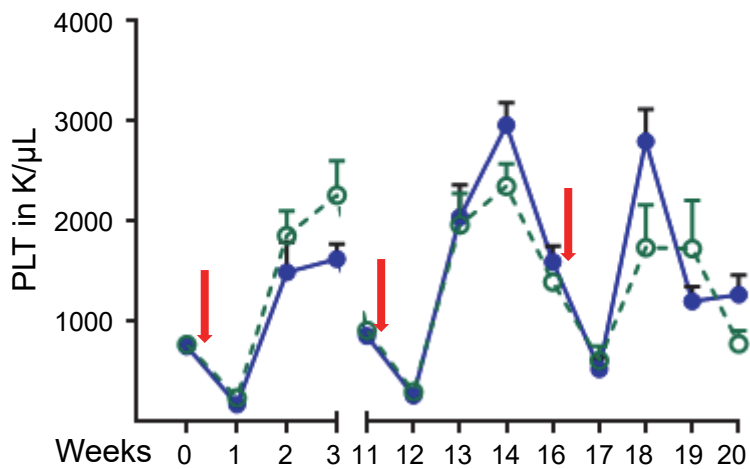

Supplement: blood874677-suppl1.pdf [file blood874677-suppl1.pdf]
